# Supplementary material for: Protocadherin-dependent dendritic self-avoidance regulates neural connectivity and circuit function
Source: eLife journal article supplement (doi:10.7554/elife.08964), 2015-07-03

Figure 6 - figure supplement 1

**A** Comparison of ON and OFF directional spiking responses in vDSGCs

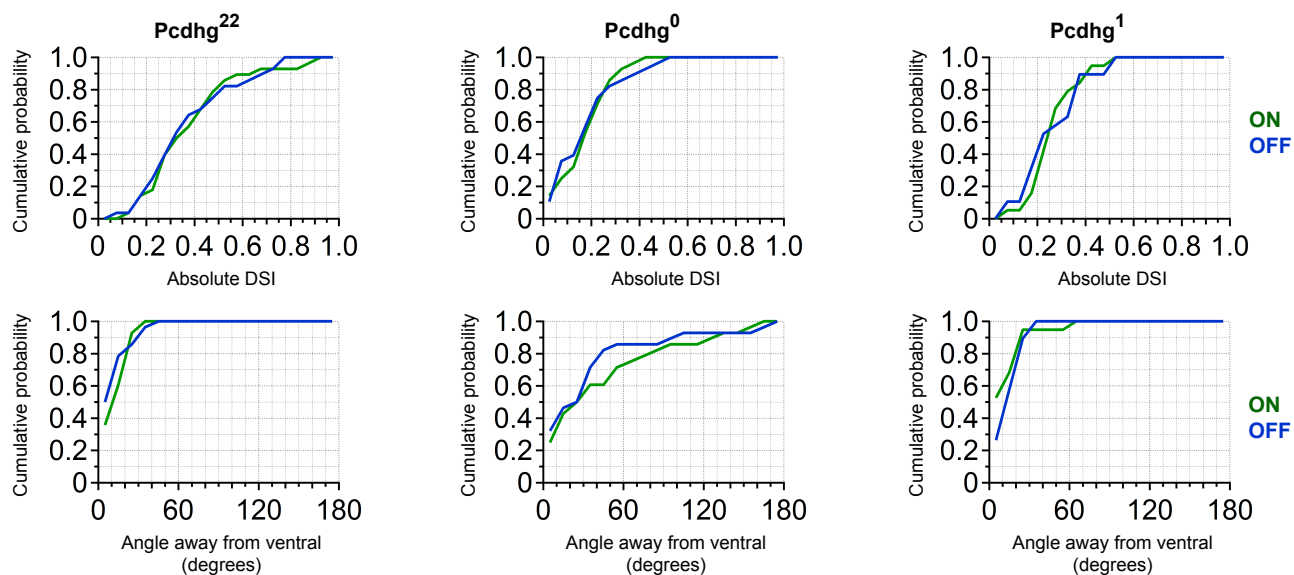

**B** Comparison of ON and OFF directional current sizes in vDSGCs

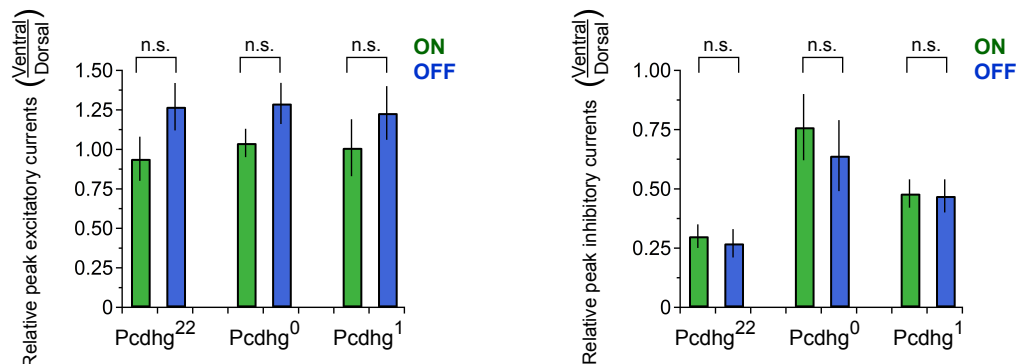

**C** Comparison of ON and OFF directional current sizes in vDSGCs

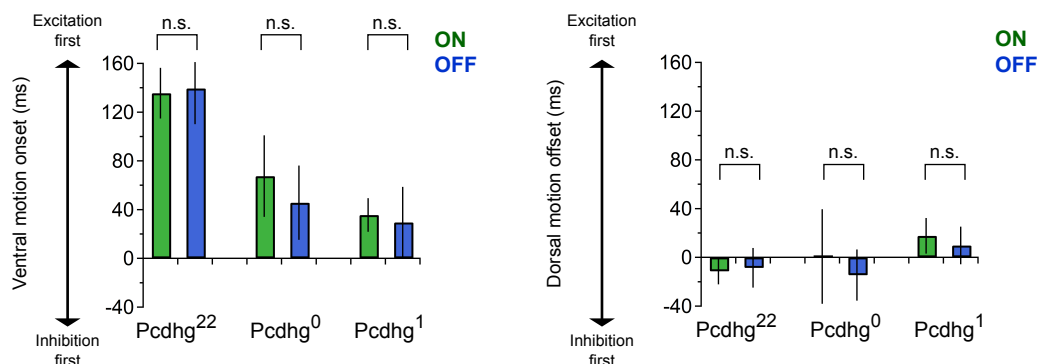

Supplement: supp [file elife_poa_e08964_Figure_6_figure_supplement_1.pdf › elife_poa_e08964_Figure_6_figure_supplement_1.pdf]
