# Supplementary figures and images for: Protocadherin-dependent dendritic self-avoidance regulates neural connectivity and circuit function
Source: eLife journal article supplement (doi:10.7554/elife.08964), 2015-07-03

Figure 2 - figure supplement 1

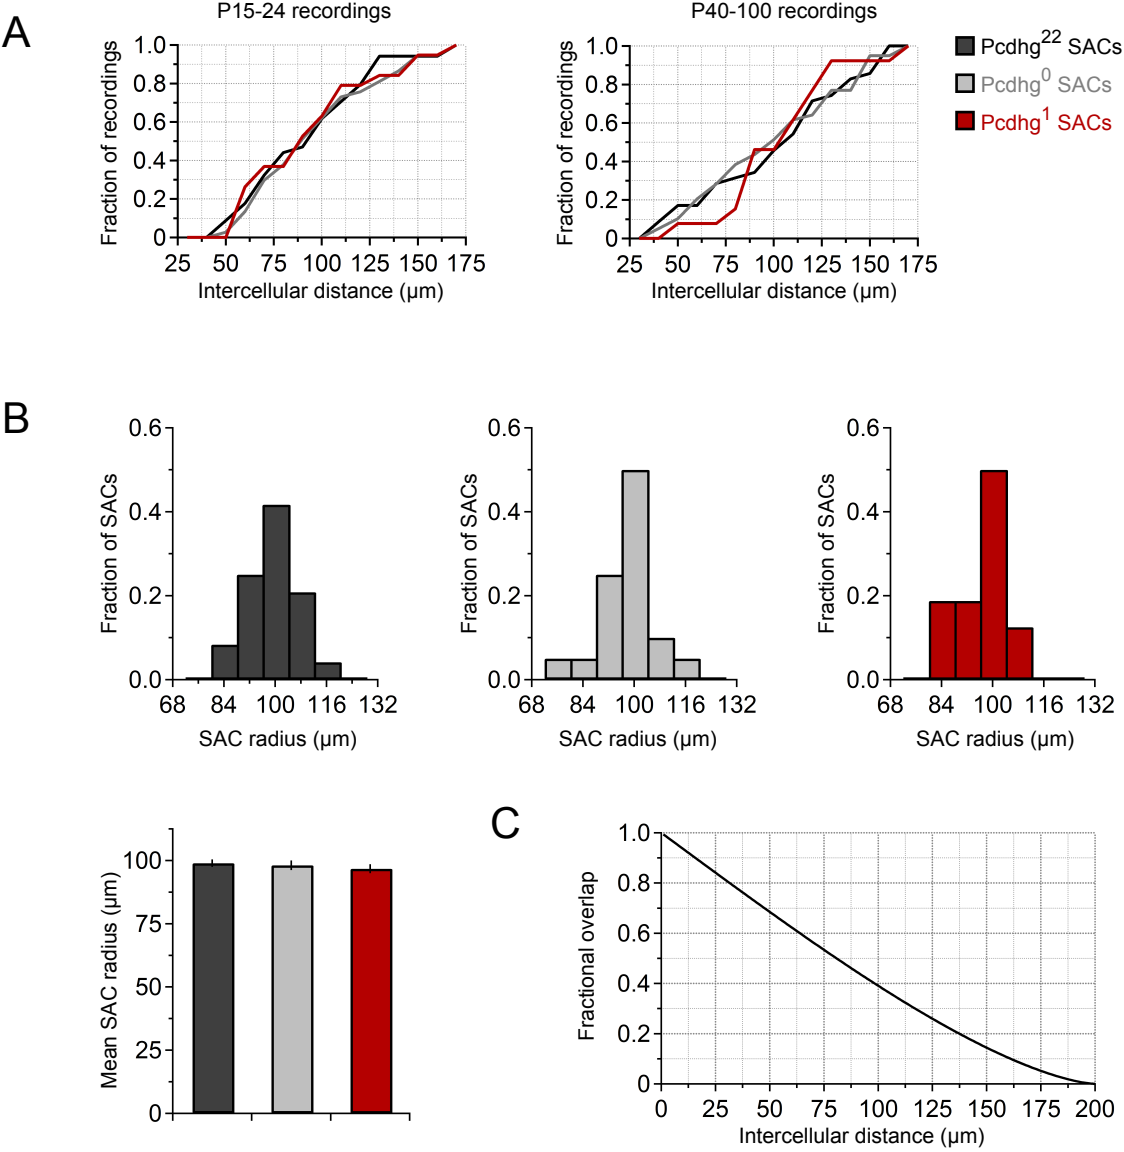

Supplement: supp [file elife_poa_e08964_Figure_2_figure_supplement_1.pdf › elife_poa_e08964_Figure_2_figure_supplement_1.pdf]

Figure 2 - figure supplement 2

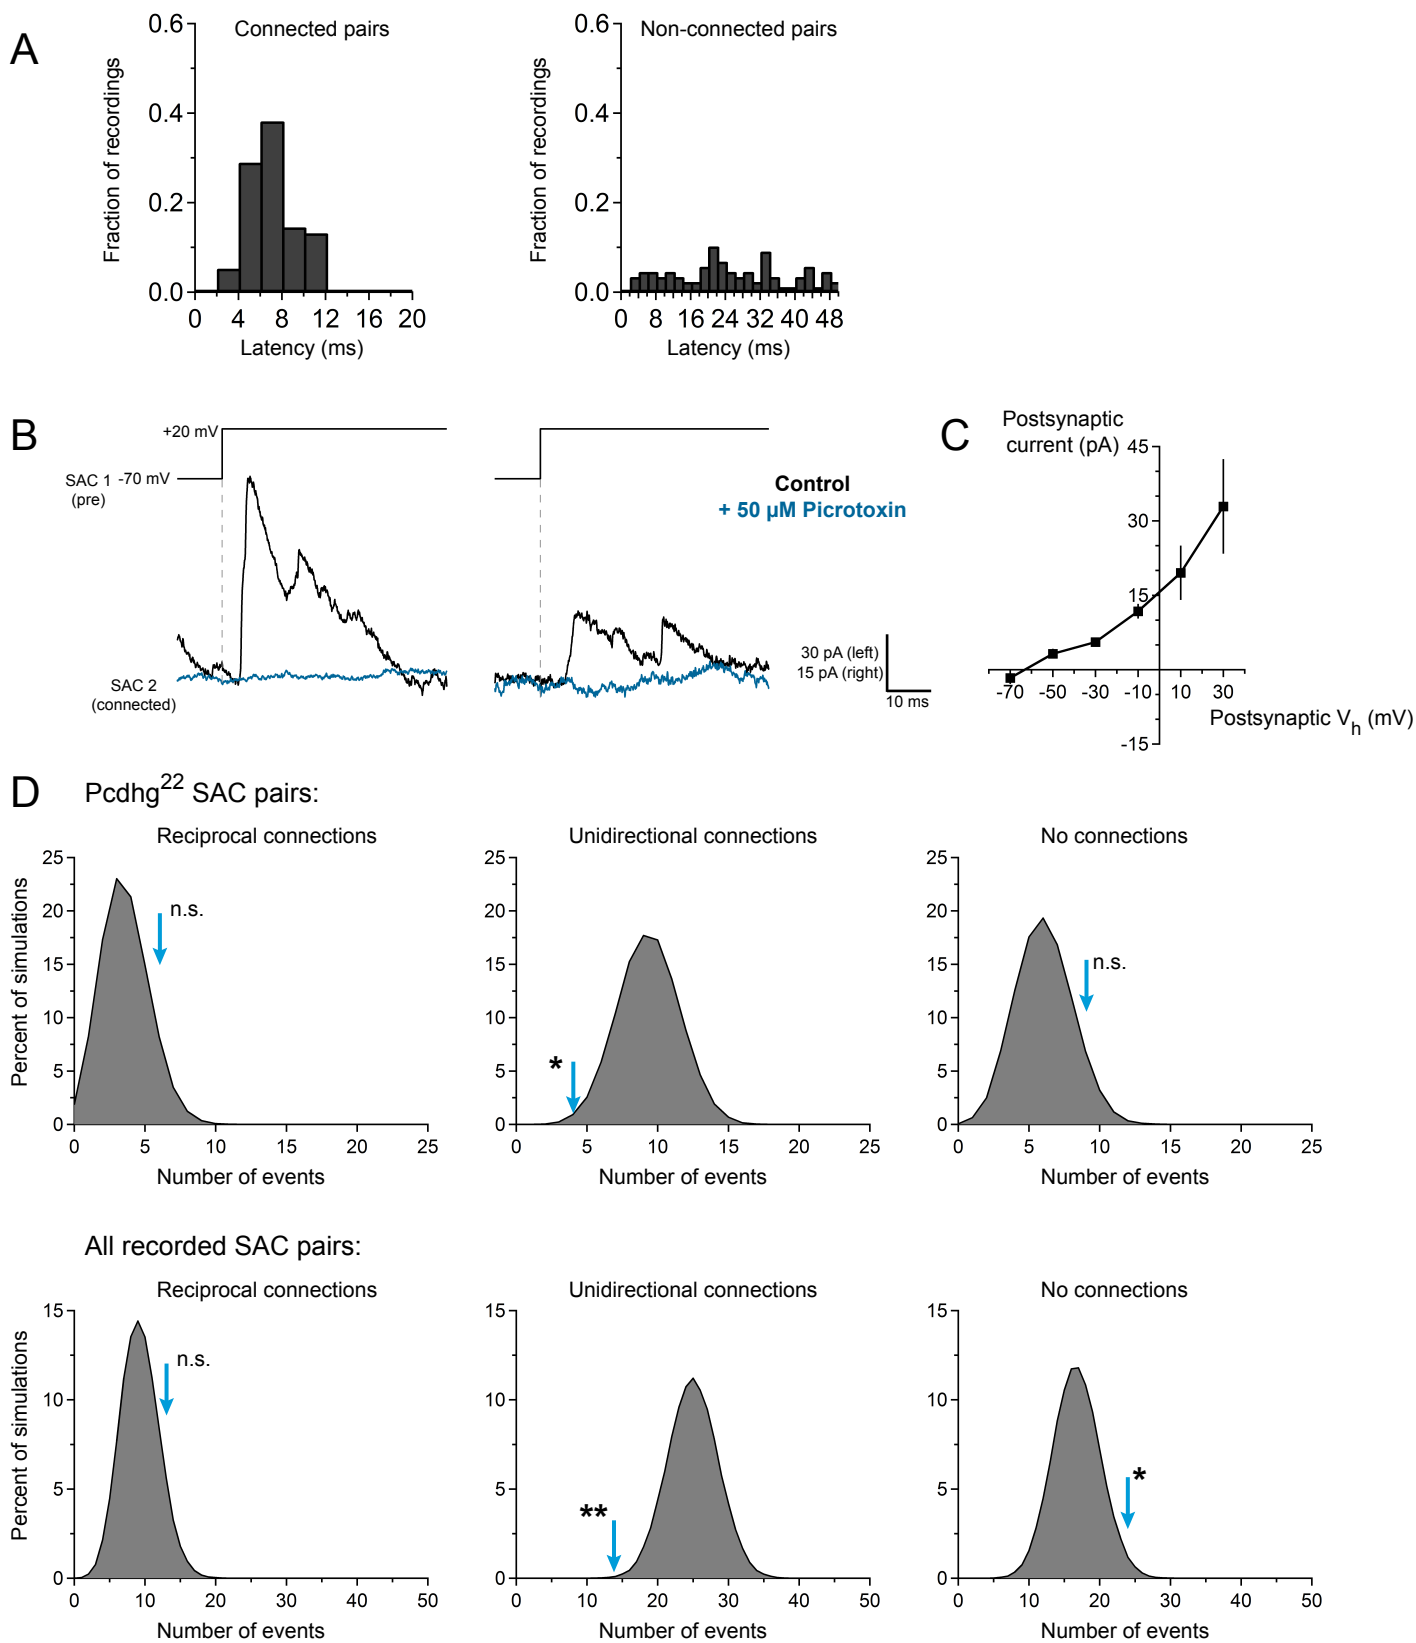

Supplement: supp [file elife_poa_e08964_Figure_2_figure_supplement_2.pdf › elife_poa_e08964_Figure_2_figure_supplement_2.pdf]

Figure 2 - figure supplement 3

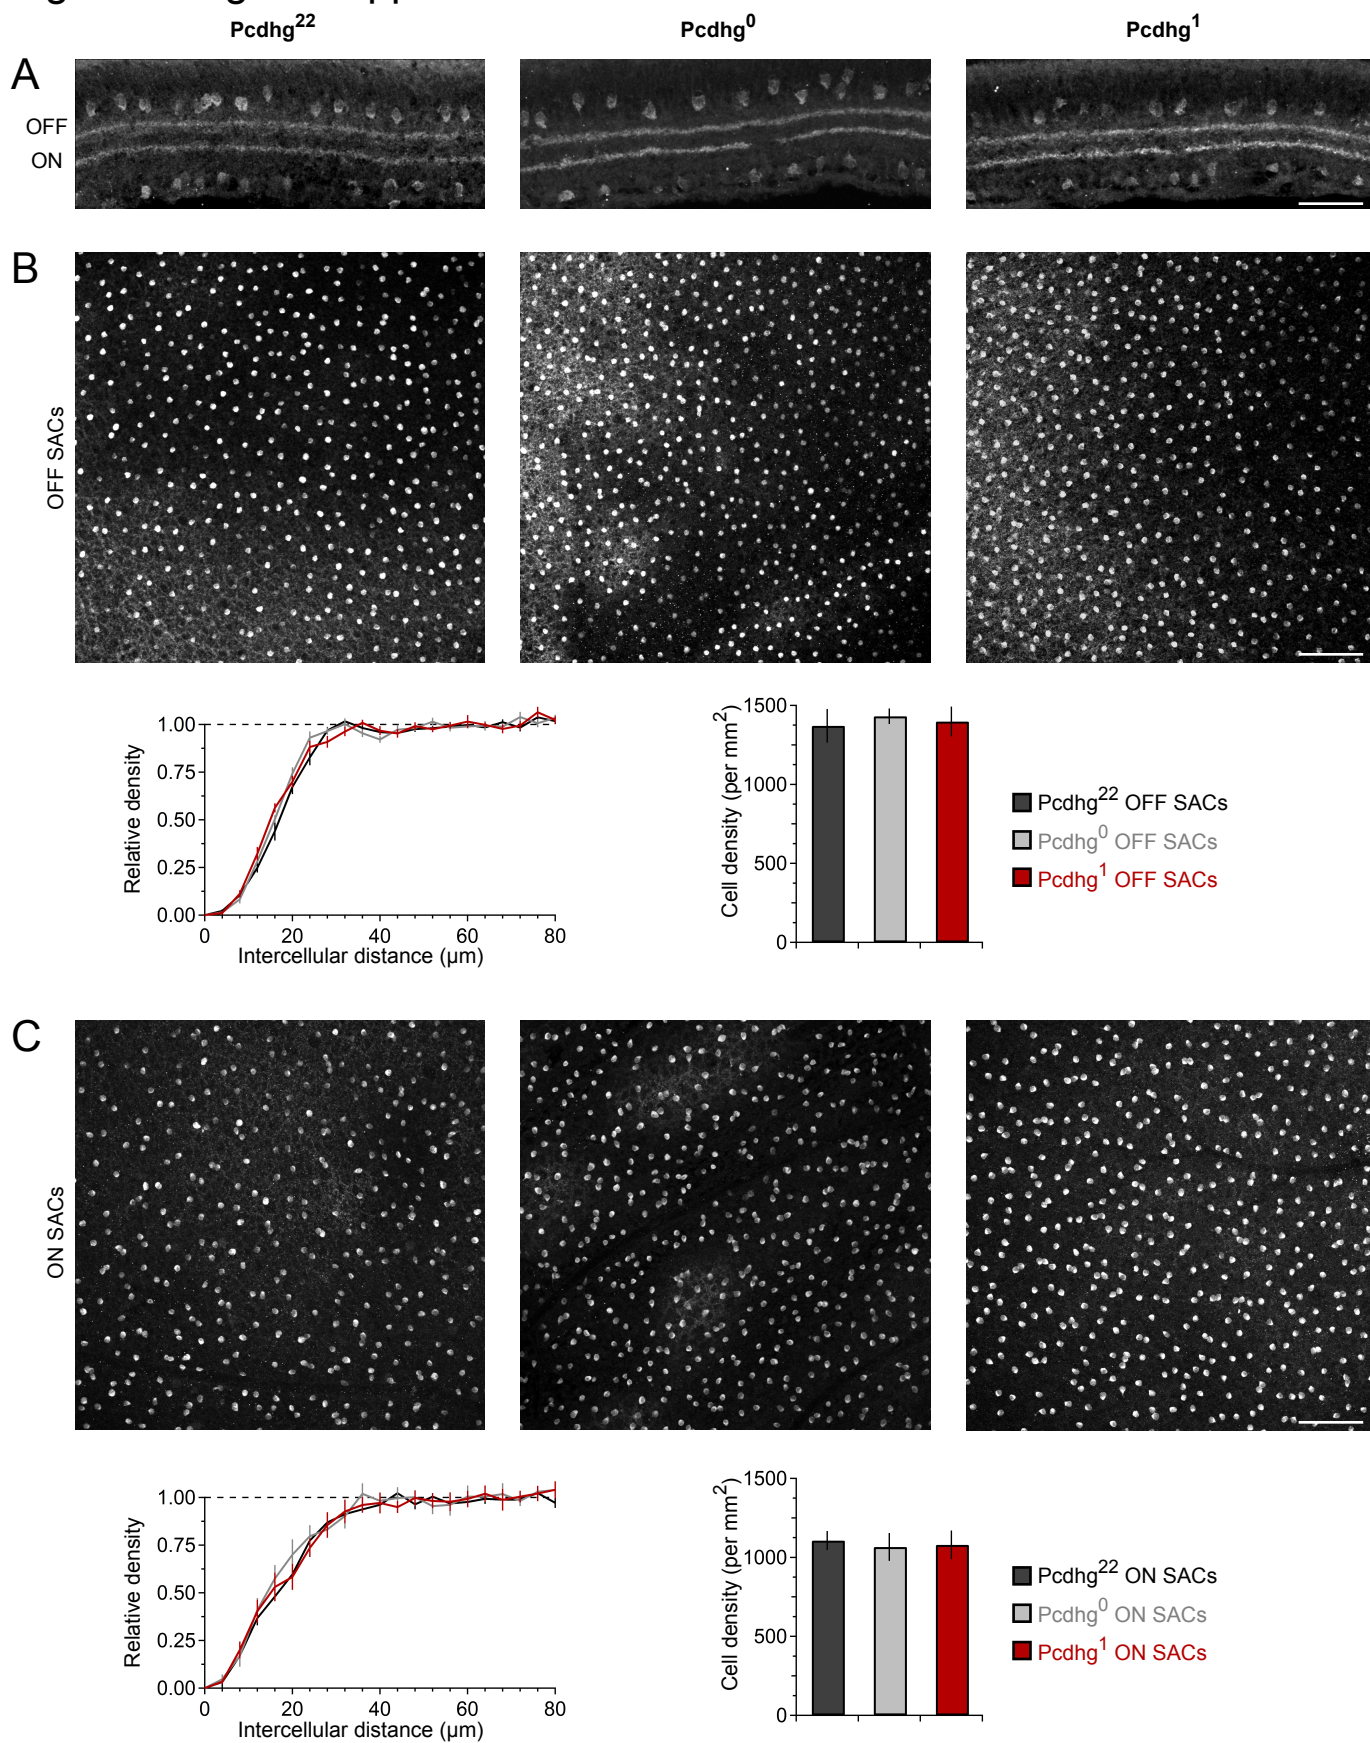

Supplement: supp [file elife_poa_e08964_Figure_2_figure_supplement_3.pdf › elife_poa_e08964_Figure_2_figure_supplement_3.pdf]

Figure 2 - figure supplement 4

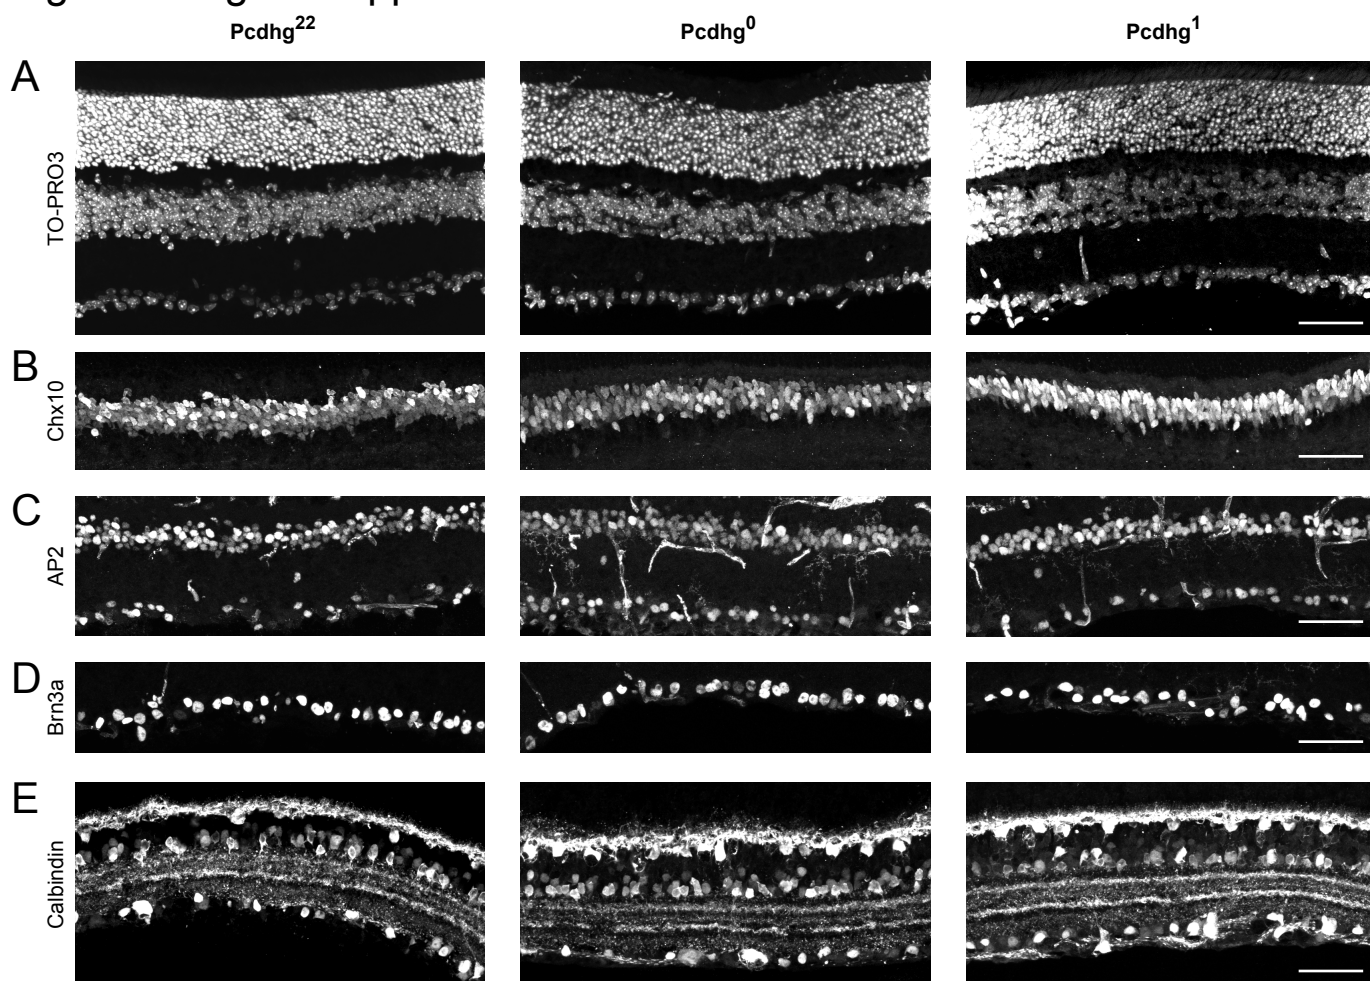

Supplement: supp [file elife_poa_e08964_Figure_2_figure_supplement_4.pdf › elife_poa_e08964_Figure_2_figure_supplement_4.pdf]

Figure 3 - figure supplement 1

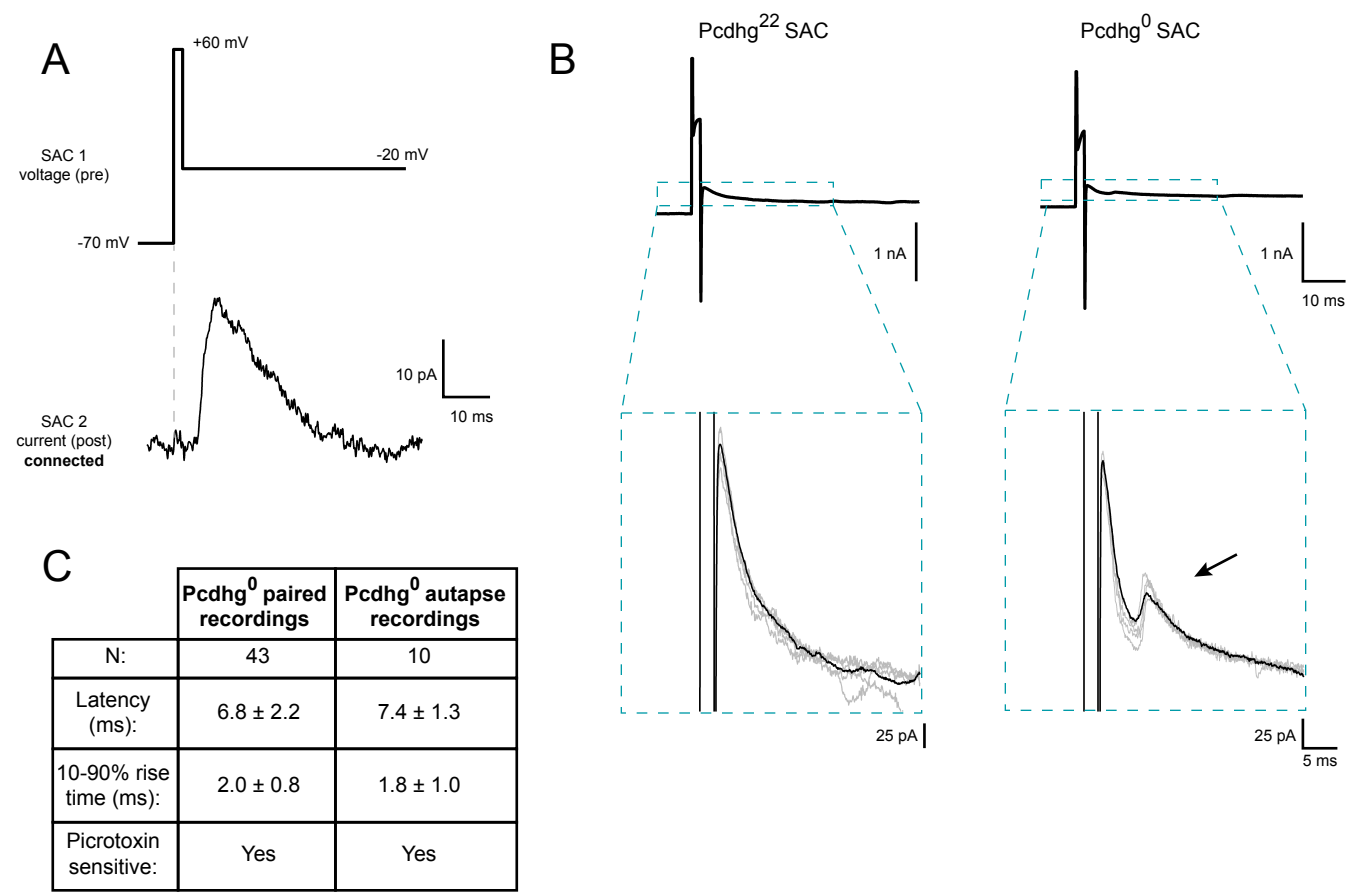

Supplement: supp [file elife_poa_e08964_Figure_3_figure_supplement_1.pdf › elife_poa_e08964_Figure_3_figure_supplement_1.pdf]

Figure 5 - figure supplement 1

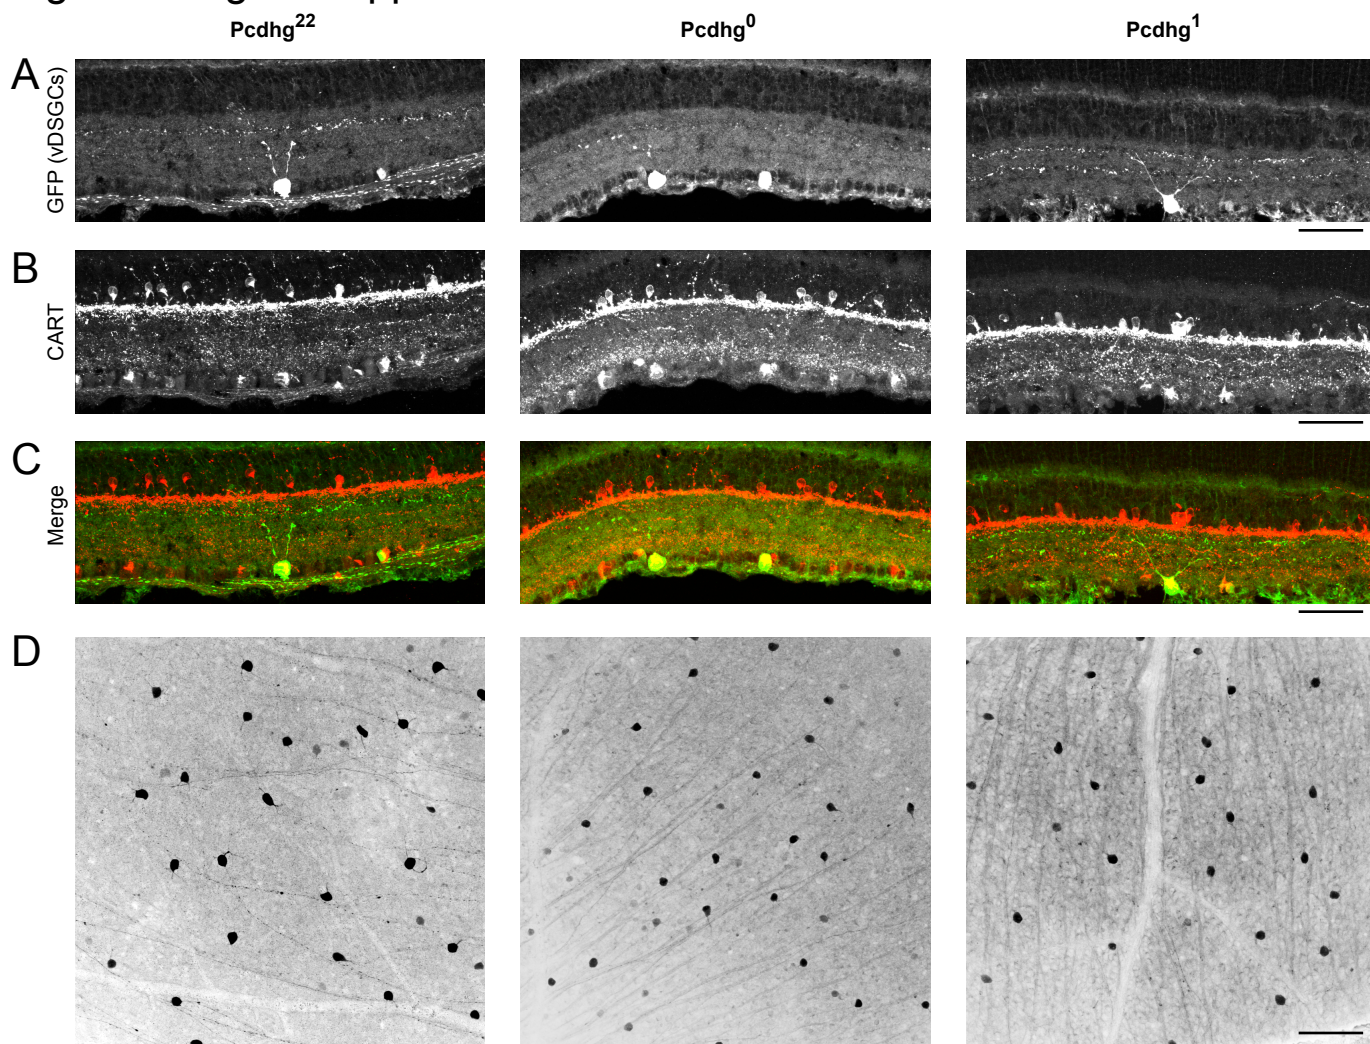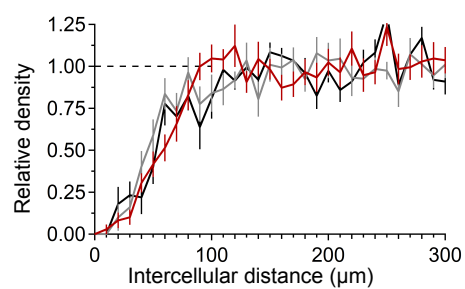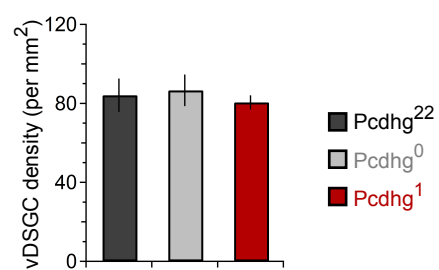

Supplement: supp [file elife_poa_e08964_Figure_5_figure_supplement_1.pdf › elife_poa_e08964_Figure_5_figure_supplement_1.pdf]

Figure 6 - figure supplement 2

A

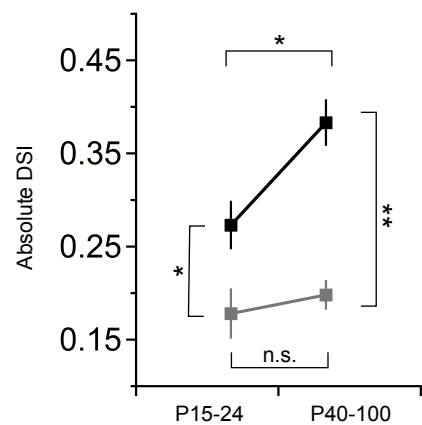

B

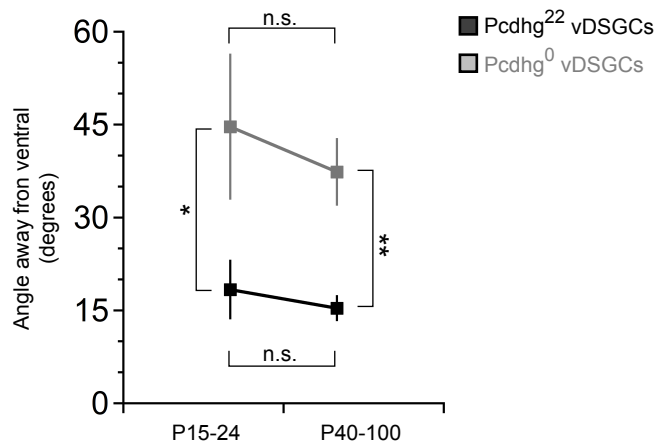

Supplement: supp [file elife_poa_e08964_Figure_6_figure_supplement_2.pdf › elife_poa_e08964_Figure_6_figure_supplement_2.pdf]
